# Supplementary material for: Identification of NO2 and SO2 Pollution Hotspots and Sources in Jiangsu Province of China
Source: MDPI journal article supplement (doi:10.3390/rs13183742), 2021-09-18
Supplement: s1 [file s1]

**Table S1.** City-level Ratio of SO<sub>2</sub>/NO<sub>2</sub> in Jiangsu province.

| Season           | Annual | Winter | Spring | Summer | Autumn |
|------------------|--------|--------|--------|--------|--------|
| Nanjing          | 0.91   | 0.82   | 0.95   | 1.06   | 0.91   |
| Wuxi             | 0.78   | 0.69   | 0.83   | 0.95   | 0.74   |
| Xuzhou           | 1.03   | 0.92   | 1.19   | 1.15   | 1.02   |
| Changzhou        | 0.80   | 0.71   | 0.84   | 0.90   | 0.80   |
| Suzhou           | 0.78   | 0.68   | 0.83   | 0.96   | 0.78   |
| Nantong          | 0.89   | 0.84   | 0.98   | 0.88   | 0.88   |
| Lianyungang      | 1.04   | 0.94   | 1.22   | 0.94   | 1.02   |
| Huaian           | 1.02   | 0.92   | 1.17   | 0.97   | 1.11   |
| Yancheng         | 1.04   | 0.95   | 1.20   | 0.93   | 1.07   |
| Yangzhou         | 0.97   | 0.91   | 1.03   | 0.89   | 0.98   |
| Zhenjiang        | 0.87   | 0.76   | 0.89   | 1.10   | 0.84   |
| Taizhou          | 0.95   | 0.88   | 1.02   | 0.97   | 0.95   |
| Suqian           | 1.02   | 0.89   | 1.19   | 1.10   | 1.08   |
| Jiangsu Province | 0.97   | 0.90   | 1.07   | 0.97   | 0.93   |

**Table S2.** City-level correlation between NO2 and SO2 from 2005 to 2020.

|                  | <b>Overall</b> | <b>Winter</b> | <b>Spring</b> | <b>Summer</b> | <b>Autumn</b> |
|------------------|----------------|---------------|---------------|---------------|---------------|
| Nanjing          | 0.69*          | 0.19          | 0.49*         | -0.03         | 0.47          |
| Wuxi             | 0.64*          | 0.50*         | 0.53*         | 0.16          | 0.62*         |
| Xuzhou           | 0.70*          | 0.61*         | 0.52*         | 0.19          | 0.14          |
| Changzhou        | 0.61*          | 0.17          | 0.22          | -0.21         | 0.29          |
| Suzhou           | 0.60*          | 0.42          | 0.65*         | 0.36          | 0.47          |
| Nantong          | 0.60*          | -0.02         | 0.67*         | 0.55*         | 0.13          |
| Lianyungang      | 0.70*          | 0.43          | 0.31          | 0.10          | -0.28         |
| Huaian           | 0.75*          | 0.49*         | 0.38          | -0.08         | 0.12          |
| Yancheng         | 0.71*          | 0.36          | 0.54*         | -0.04         | -0.14         |
| Yangzhou         | 0.65*          | 0.05          | 0.29          | 0.18          | 0.41          |
| Zhenjiang        | 0.64*          | 0.33          | 0.53*         | 0.61*         | 0.48          |
| Taizhou          | 0.64*          | 0.04          | 0.41          | 0.52*         | 0.18          |
| Suqian           | 0.64*          | 0.39          | 0.41          | -0.34         | -0.30         |
| Jiangsu Province | 0.78*          | 0.36          | 0.61*         | 0.41          | 0.20          |

**Table S3.** City-level seasonal trends of NO<sub>2</sub> in Jiangsu province. The symbol asterisk (\*) represents change at a 95% significant level.

| Time Periods | Season | Nanjing | Wuxi    | Xuzhou | Changzhou | Suzhou  | Nantong | Lianyungang | Huaian  | Yancheng | Yangzhou | Zhenjiang | Taizhou | Suqian  | Jiangsu Province |
|--------------|--------|---------|---------|--------|-----------|---------|---------|-------------|---------|----------|----------|-----------|---------|---------|------------------|
| 2005-2020    | Winter | -0.007  | -0.013  | -0.004 | -0.005    | -0.012  | 0.003   | -0.0004     | -0.01   | -0.007   | -0.008   | -0.014    | -0.007  | -0.006  | -0.005           |
|              | Spring | -0.007  | -0.011  | -0.004 | -0.006    | -0.012  | -0.009  | -0.003      | -0.005  | -0.005   | -0.009   | -0.009    | -0.008  | -0.004  | -0.008*          |
|              | Summer | -0.003  | -0.004  | -0.002 | -0.004    | -0.005* | -0.006* | 0.002       | 0.00003 | 0.001    | -0.006*  | -0.009*   | -0.005* | 0.001   | -0.003*          |
|              | Autumn | -0.009* | -0.015* | -0.004 | -0.012    | -0.013* | -0.006  | 0.005       | -0.001  | 0.001    | -0.006*  | -0.013*   | -0.005  | 0.002   | -0.004           |
| 2006-2010    | Winter | 0.033   | 0.016   | 0.038  | 0.025     | 0.013   | 0.057*  | 0.036       | 0.056   | 0.04     | 0.04     | 0.055     | 0.049   | 0.045   | 0.045            |
|              | Spring | 0.039*  | 0.043*  | 0.026  | 0.068*    | 0.022   | 0.002   | 0.025       | 0.029   | 0.014    | 0.031    | 0.045*    | 0.027   | 0.029   | 0.023            |
|              | Summer | 0.014*  | 0.017   | 0.008  | 0.022*    | 0.019   | 0.009   | 0.004       | 0.002   | -0.003   | 0.001    | 0.018     | -0.004  | 0.005   | 0.008            |
|              | Autumn | 0.009   | 0.014   | 0.011  | 0.020     | 0.018   | 0.072   | 0.019       | 0.015   | 0.029    | 0.031    | 0.030     | 0.042   | 0.024   | 0.027            |
| 2011-2015    | Winter | -0.039  | -0.028  | -0.056 | -0.006    | -0.029  | 0.017   | -0.031      | -0.025  | -0.03    | -0.006   | 0.031     | 0.005   | -0.067  | -0.039           |
|              | Spring | -0.065* | -0.054  | -0.041 | -0.057    | -0.057* | -0.070  | -0.047*     | -0.054* | -0.055   | -0.056   | -0.065    | -0.058  | -0.049* | -0.051           |
|              | Summer | -0.014  | -0.019  | -0.006 | -0.023    | -0.001  | -0.034  | -0.0001     | -0.007  | -0.008   | -0.023   | -0.033    | -0.019  | -0.002  | -0.01            |
|              | Autumn | -0.043* | -0.056* | -0.037 | -0.066    | -0.025* | -0.017  | -0.034      | -0.014  | -0.001   | -0.006   | -0.048*   | -0.013  | -0.009  | -0.022           |
| 2013-2017    | Winter | -0.089* | -0.085  | -0.092 | -0.08     | -0.055  | -0.036  | -0.038      | -0.062* | -0.038*  | -0.05    | -0.094    | -0.076  | -0.084* | -0.062*          |
|              | Spring | -0.051  | -0.029  | -0.019 | -0.048    | -0.039  | -0.009  | -0.022      | -0.008  | -0.014   | -0.021   | -0.034    | -0.032  | -0.016  | -0.027           |
|              | Summer | -0.004  | -0.009  | -0.002 | -0.012    | -0.001  | 0.014   | 0.003       | 0.003   | 0.007    | 0.004    | -0.011    | -0.003  | 0.002   | 0.00004          |
|              | Autumn | -0.017  | -0.025  | -0.055 | -0.025    | -0.024* | -0.012  | -0.019      | -0.026  | -0.012   | -0.007   | -0.033    | -0.013  | -0.020  | -0.026           |

**Table S4.** City-level trends of SO<sub>2</sub> in Jiangsu province. The symbol asterisk (\*) represents change at a 95% significant level.

| Time Periods | Season | Nanjing | Wuxi    | Xuzhou  | Changzhou | Suzhou  | Nantong | Lianyungang | Huaian  | Yancheng | Yangzhou | Zhenjiang | Taizhou | Suqian  | Jiangsu Province |
|--------------|--------|---------|---------|---------|-----------|---------|---------|-------------|---------|----------|----------|-----------|---------|---------|------------------|
| 2005-2020    | Winter | -0.025* | -0.027* | -0.033* | -0.029*   | -0.025* | -0.016  | -0.029*     | -0.018* | -0.017*  | -0.022*  | -0.023*   | -0.018  | -0.021* | -0.026*          |
|              | Spring | -0.018* | -0.030* | -0.030* | -0.018*   | -0.033* | -0.030* | -0.032*     | -0.019* | -0.021*  | -0.021*  | -0.029*   | -0.026* | -0.021* | -0.029*          |
|              | Summer | -0.010  | -0.014* | -0.010  | -0.005    | -0.019* | -0.012* | -0.008*     | -0.004  | -0.005   | -0.006   | -0.013*   | -0.015* | -0.006  | -0.008*          |
|              | Autumn | -0.029* | -0.035* | -0.036* | -0.034*   | -0.031* | -0.013  | -0.024*     | -0.017* | -0.016*  | -0.020*  | -0.032*   | -0.024* | -0.022* | -0.023*          |
| 2006-2010    | Winter | -0.105  | -0.033  | -0.048  | -0.086    | -0.063  | -0.054  | -0.082      | 0.011   | 0.002    | -0.063   | -0.063    | -0.056  | -0.045  | -0.016           |
|              | Spring | -0.049  | -0.018  | -0.100  | -0.065    | -0.052  | 0.016   | -0.087      | -0.035  | -0.044   | -0.095   | -0.052    | -0.059  | -0.028  | -0.058           |
|              | Summer | -0.044  | -0.008  | 0.019   | -0.0001   | 0.032   | -0.006  | -0.005      | -0.001  | -0.026   | -0.050   | 0.063     | -0.031  | -0.004  | 0.001            |
|              | Autumn | -0.099  | -0.053  | -0.176  | -0.084    | -0.098  | -0.036  | -0.138      | -0.077  | -0.062   | -0.084   | -0.049    | -0.082  | -0.139  | -0.061           |
| 2011-2015    | Winter | 0.021   | -0.025  | -0.1    | 0.027     | -0.0004 | -0.025  | -0.056      | -0.012  | -0.033   | -0.012   | -0.04     | -0.051  | -0.06   | -0.056           |
|              | Spring | -0.096  | -0.066  | -0.080  | -0.060    | -0.070  | -0.054  | -0.084*     | -0.048  | -0.050   | -0.049*  | -0.051    | -0.003  | -0.048  | -0.039           |
|              | Summer | 0.039   | -0.074  | -0.039  | 0.019     | -0.065  | -0.017  | -0.053      | 0.015   | -0.034   | 0.005    | -0.005    | -0.067  | 0.024   | -0.041           |
|              | Autumn | 0.019   | -0.049  | -0.038  | 0.011     | -0.077  | 0.016   | -0.082      | -0.010  | -0.043   | 0.014    | 0.069     | 0.004   | 0.018   | -0.038           |
| 2013-2017    | Winter | -0.016  | -0.02   | -0.156* | -0.036    | -0.033  | -0.043  | -0.082      | -0.019  | -0.007   | -0.011   | 0.02      | 0.015   | -0.059  | -0.049*          |
|              | Spring | -0.022  | -0.103  | -0.072  | -0.065    | -0.035  | -0.066  | -0.051      | -0.097  | -0.041   | -0.002   | -0.044    | -0.045  | -0.041  | -0.049           |
|              | Summer | -0.050  | -0.027  | -0.006  | 0.003     | -0.050  | -0.017  | -0.017      | -0.005  | 0.014    | 0.016    | -0.029    | 0.003   | -0.009  | -0.016           |
|              | Autumn | -0.004  | -0.051  | -0.052  | -0.051    | -0.017  | -0.021  | -0.001      | -0.051  | -0.025   | -0.077   | -0.088    | -0.082  | -0.056  | -0.036           |
